# Supplementary material
Source: PubMed Central journal article supplement (PMC4466732)
Supplement: pnas.201502932SI.pdf [file pnas.201502932SI.pdf]

# Supporting Information

Ruff et al. 10.1073/pnas.1502932112

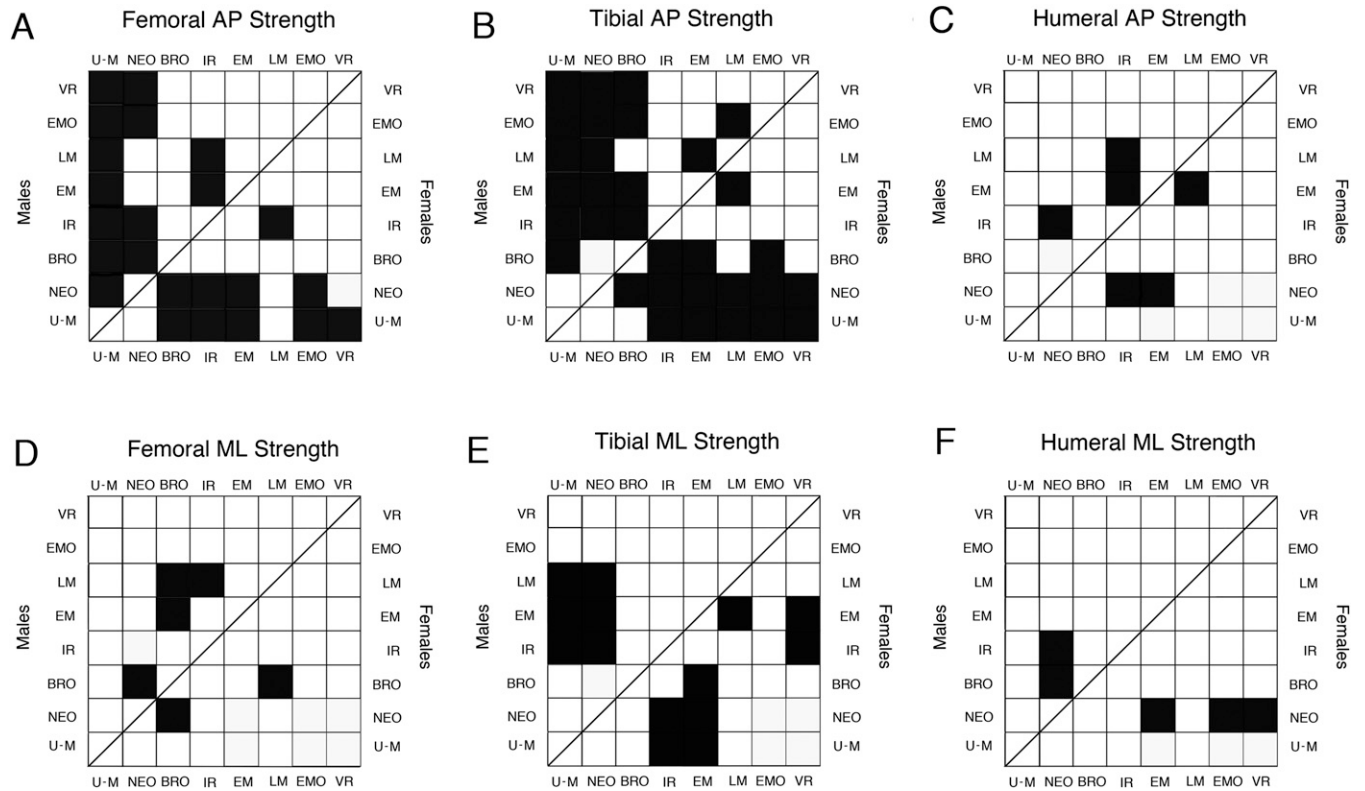

**Fig. S1.** Results of pairwise comparisons between temporal periods, combining Upper Paleolithic and Mesolithic periods (U–M). (A) Femoral A–P strength. (B) Tibial A–P strength. (C) Humeral A–P strength. (D) Femoral M–L strength. (E) Tibial M–L strength. (F) Humeral M–L strength. In all panels, males: *Upper Left*; females: *Lower Right*. Black filled squares: significant ( $P < 0.05$ ) Games–Howell tests. BRO, bronze; EM, Early Medieval; EMO, early modern; IR, Iron/Roman; LM, Late Medieval; NEO, Neolithic; U–M, Upper Paleolithic–Mesolithic; VR, very recent.

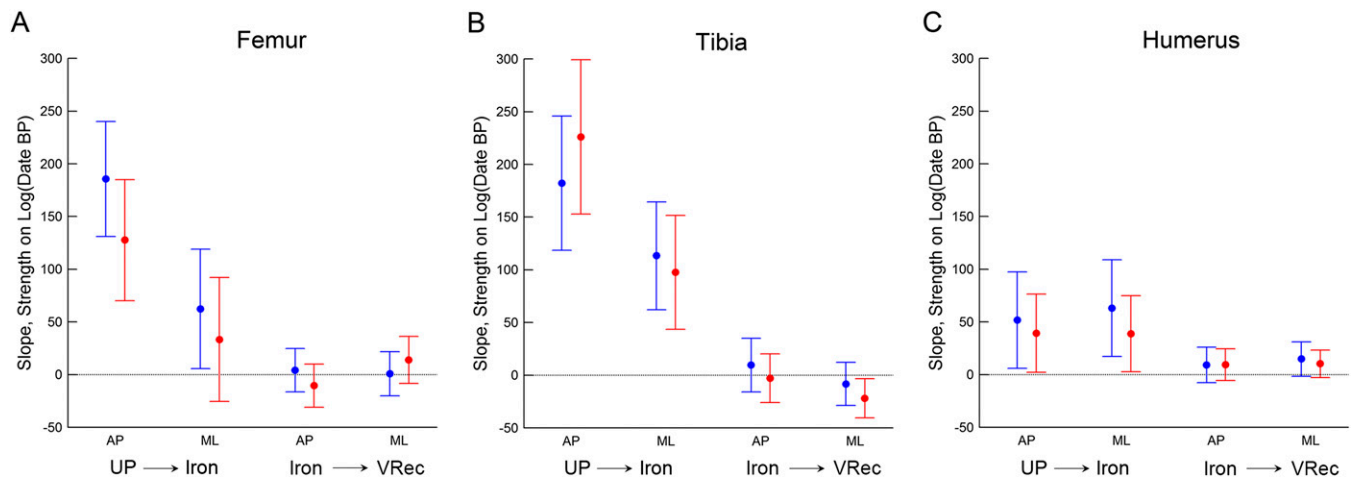

**Fig. S2.** Regression slopes  $\pm$  95% CI, for femoral (A), tibial (B), and humeral (C) relative strengths against  $\log_{10}(\text{Cal y B.P.})$ , corrected for bi-iliac breadth/stature, for two temporal ranges: Upper Paleolithic (UP) through Iron Age, and Iron Age through very recent (VRec) (see Table 1). Males: blue; females: red. Because time is represented in reverse (years before present), positive slopes indicate negative chronological trends. See Table S3 for associated statistics.

**Table S1. Cross-sectional properties by temporal period and sex, standardized by body mass  $\times$  bone length**

| Period                |          | FZxstd | FZystd | TZxstd | TZystd | HZxstd | HZystd |
|-----------------------|----------|--------|--------|--------|--------|--------|--------|
| <b>Very recent</b>    |          |        |        |        |        |        |        |
| Male                  | <i>n</i> | 94     | 94     | 76     | 76     | 51     | 51     |
|                       | Mean     | 578.6  | 628.0  | 598.3  | 463.8  | 350.2  | 314.6  |
|                       | SE       | 9.2    | 9.5    | 11.6   | 10.3   | 11.4   | 10.4   |
| Female                | <i>n</i> | 57     | 57     | 51     | 51     | 38     | 38     |
|                       | Mean     | 514.6  | 571.0  | 514.1  | 413.9  | 259.6  | 229.5  |
|                       | SE       | 8.6    | 13.8   | 11.6   | 10.0   | 8.9    | 7.1    |
| <b>Early Modern</b>   |          |        |        |        |        |        |        |
| Male                  | <i>n</i> | 85     | 85     | 78     | 78     | 74     | 74     |
|                       | Mean     | 558.9  | 620.7  | 574.7  | 454.0  | 335.7  | 311.5  |
|                       | SE       | 10.1   | 10.5   | 15.0   | 14.1   | 7.8    | 7.8    |
| Female                | <i>n</i> | 50     | 50     | 53     | 53     | 45     | 45     |
|                       | Mean     | 493.4  | 576.5  | 479.1  | 392.9  | 252.8  | 232.5  |
|                       | SE       | 12.9   | 15.5   | 16.8   | 13.3   | 9.6    | 8.2    |
| <b>Late Medieval</b>  |          |        |        |        |        |        |        |
| Male                  | <i>n</i> | 204    | 204    | 182    | 182    | 147    | 147    |
|                       | Mean     | 595.5  | 645.0  | 632.2  | 462.5  | 345.8  | 319.4  |
|                       | SE       | 6.7    | 6.7    | 9.4    | 6.7    | 5.7    | 5.7    |
| Female                | <i>n</i> | 177    | 177    | 150    | 150    | 128    | 128    |
|                       | Mean     | 530.5  | 592.0  | 521.0  | 392.3  | 284.1  | 251.3  |
|                       | SE       | 6.9    | 7.5    | 7.8    | 6.0    | 5.9    | 4.9    |
| <b>Early Medieval</b> |          |        |        |        |        |        |        |
| Male                  | <i>n</i> | 155    | 155    | 144    | 144    | 120    | 120    |
|                       | Mean     | 594.6  | 637.1  | 573.2  | 434.4  | 349.9  | 323.7  |
|                       | SE       | 7.6    | 7.8    | 9.7    | 7.3    | 5.6    | 5.8    |
| Female                | <i>n</i> | 119    | 119    | 111    | 111    | 88     | 88     |
|                       | Mean     | 507.2  | 567.2  | 476.3  | 361.0  | 259.2  | 236.3  |
|                       | SE       | 7.7    | 7.9    | 7.6    | 6.4    | 4.4    | 4.5    |
| <b>Iron/Roman</b>     |          |        |        |        |        |        |        |
| Male                  | <i>n</i> | 139    | 139    | 125    | 125    | 94     | 94     |
|                       | Mean     | 543.7  | 607.7  | 597.4  | 436.4  | 315.1  | 300.2  |
|                       | SE       | 10.4   | 10.2   | 12.9   | 9.6    | 7.3    | 6.5    |
| Female                | <i>n</i> | 131    | 131    | 119    | 119    | 97     | 97     |
|                       | Mean     | 489.4  | 574.8  | 493.1  | 372.0  | 264.0  | 246.8  |
|                       | SE       | 7.4    | 9.1    | 10.4   | 7.6    | 5.9    | 5.9    |
| <b>Bronze</b>         |          |        |        |        |        |        |        |
| Male                  | <i>n</i> | 114    | 114    | 100    | 100    | 82     | 82     |
|                       | Mean     | 564.5  | 589.9  | 681.9  | 469.8  | 329.1  | 303.9  |
|                       | SE       | 9.1    | 9.7    | 14.4   | 9.0    | 6.4    | 6.2    |
| Female                | <i>n</i> | 83     | 83     | 75     | 75     | 64     | 64     |
|                       | Mean     | 499.0  | 541.1  | 545.7  | 396.4  | 270.8  | 254.2  |
|                       | SE       | 10.0   | 11.9   | 11.8   | 8.3    | 5.7    | 6.1    |
| <b>Neolithic</b>      |          |        |        |        |        |        |        |
| Male                  | <i>n</i> | 157    | 157    | 150    | 150    | 116    | 116    |
|                       | Mean     | 616.5  | 645.0  | 710.0  | 497.8  | 349.3  | 340.6  |
|                       | SE       | 7.8    | 9.1    | 12.0   | 9.1    | 6.3    | 6.7    |
| Female                | <i>n</i> | 108    | 108    | 94     | 94     | 76     | 76     |
|                       | Mean     | 544.6  | 603.0  | 596.2  | 420.5  | 290.3  | 266.2  |
|                       | SE       | 9.6    | 10.1   | 11.5   | 9.1    | 5.9    | 6.1    |
| <b>Mesolithic</b>     |          |        |        |        |        |        |        |
| Male                  | <i>n</i> | 37     | 37     | 28     | 28     | 16     | 16     |
|                       | Mean     | 694.6  | 672.9  | 778.0  | 521.8  | 354.8  | 356.7  |
|                       | SE       | 18.3   | 16.0   | 31.2   | 16.4   | 21.1   | 24.2   |
| Female                | <i>n</i> | 14     | 14     | 8      | 8      | 6      | 6      |
|                       | Mean     | 608.8  | 610.1  | 617.1  | 443.5  | 345.4  | 314.3  |
|                       | SE       | 25.3   | 30.1   | 32.3   | 29.5   | 49.1   | 44.7   |

**Table S1. Cont.**

| Period            |          | FZxstd | FZystd | TZxstd | TZystd | HZxstd | HZystd |
|-------------------|----------|--------|--------|--------|--------|--------|--------|
| Upper Paleolithic |          |        |        |        |        |        |        |
| Male              | <i>n</i> | 23     | 23     | 18     | 18     | 14     | 14     |
|                   | Mean     | 709.8  | 590.7  | 747.4  | 494.7  | 352.8  | 311.4  |
|                   | SE       | 28.1   | 21.6   | 26.0   | 20.65  | 17.0   | 18.1   |
| Female            | <i>n</i> | 12     | 12     | 8      | 8      | 8      | 8      |
|                   | Mean     | 647.5  | 585.8  | 693.4  | 511.1  | 310.8  | 264.0  |
|                   | SE       | 40.7   | 26.8   | 67.6   | 38.2   | 21.4   | 19.3   |

F, femur, H, humerus; T, tibia; Zx, A–P bending strength; Zy, M–L bending strength.

**Table S2. Slopes and 95% CIs for regressions of A–P and M–L bending strengths on  $\log_{10}(\text{Cal y B.P.})$** 

| Bone    | Time range                 | Plane  | Sex    | Slope | Lower 95% CI | Upper 95% CI |
|---------|----------------------------|--------|--------|-------|--------------|--------------|
| Femur   | Upper Paleolithic–Iron Age | A–P    | Male   | 171.5 | 132.4        | 210.6        |
|         |                            |        | Female | 125.5 | 83.9         | 167.1        |
|         |                            | M–L    | Male   | 23.6  | –16.9        | 63.9         |
|         | Iron Age–very recent       | A–P    | Female | 16.8  | –29.6        | 63.2         |
|         |                            |        | Male   | –5.6  | –19.9        | 8.7          |
|         |                            | M–L    | Female | –10.6 | –25.9        | 4.7          |
| Tibia   | Upper Paleolithic–Iron Age | A–P    | Male   | 203.7 | 147.5        | 259.9        |
|         |                            |        | Female | 202.4 | 148.7        | 256.1        |
|         |                            | M–L    | Male   | 92.6  | 52.7         | 132.5        |
|         | Iron Age–very recent       | A–P    | Female | 108.9 | 69.2         | 148.7        |
|         |                            |        | Male   | 3.0   | –18.8        | 24.8         |
|         |                            | M–L    | Female | –10.4 | –30.2        | 9.4          |
| Humerus | Upper Paleolithic–Iron Age | A–P    | Male   | 48.1  | 17.0         | 79.2         |
|         |                            |        | Female | 48.1  | 19.0         | 77.2         |
|         |                            | M–L    | Male   | 47.4  | 15.7         | 79.1         |
|         | Iron Age–very recent       | A–P    | Female | 33.1  | 4.0          | 62.2         |
|         |                            |        | Male   | –8.5  | –22.3        | 5.3          |
|         |                            | M–L    | Female | 7.4   | –5.8         | 20.6         |
|         |                            | Male   | 0.8    | –12.4 | 14.0         |              |
|         |                            | Female | 13.1   | 1.5   | 24.7         |              |

Positive slopes indicate negative chronological trends. See Fig. 4.

**Table S3. Partial regression slopes and 95% CIs for regressions of A–P and M–L bending strengths on  $\log_{10}(\text{Cal y B.P.})$ , controlling for bi-iliac breadth/stature**

| Bone                 | Time range                 | Plane  | Sex    | Slope | Lower 95% CI | Upper 95% CI |
|----------------------|----------------------------|--------|--------|-------|--------------|--------------|
| Femur                | Upper Paleolithic–Iron Age | A–P    | Male   | 185.6 | 131.0        | 240.2        |
|                      |                            |        | Female | 127.6 | 70.2         | 185.0        |
|                      | Iron Age–very recent       | M–L    | Male   | 62.4  | 5.8          | 119.0        |
|                      |                            |        | Female | 33.3  | –25.5        | 92.1         |
|                      |                            | A–P    | Male   | 4.2   | –16.4        | 24.8         |
|                      |                            |        | Female | –10.4 | –30.8        | 10.0         |
| Tibia                | Upper Paleolithic–Iron Age | A–P    | Male   | 182.2 | 118.5        | 245.9        |
|                      |                            |        | Female | 226.0 | 152.8        | 299.2        |
|                      | Iron Age–very recent       | M–L    | Male   | 113.3 | 62.2         | 164.4        |
|                      |                            |        | Female | 97.6  | 43.5         | 151.7        |
|                      |                            | A–P    | Male   | 9.6   | –15.9        | 35.1         |
|                      |                            |        | Female | –2.8  | –25.8        | 20.2         |
| Humerus              | Upper Paleolithic–Iron Age | A–P    | Male   | 51.7  | 6.0          | 97.4         |
|                      |                            |        | Female | 39.3  | 2.1          | 76.5         |
|                      | Iron Age–very recent       | M–L    | Male   | 63.0  | 17.1         | 108.9        |
|                      |                            |        | Female | 38.8  | 2.8          | 74.8         |
|                      |                            | A–P    | Male   | 9.2   | –7.7         | 26.1         |
|                      |                            |        | Female | 9.5   | –5.6         | 24.6         |
| Iron Age–very recent | M–L                        | Male   | 14.8   | –1.5  | 31.1         |              |
|                      |                            | Female | 10.3   | –2.7  | 23.3         |              |

Positive slopes indicate negative chronological trends. See Fig. S2.

## Other Supporting Information Files

[Dataset S1 \(DOCX\)](#)
